# Supplementary material for: The Financial Burden Associated with Medical Costs among Childhood Cancer Patients and Their Families Related to Their Socioeconomic Status: The Perspective of National Health Insurance Service
Source: MDPI journal article supplement (doi:10.3390/ijerph17176020), 2020-08-19
Supplement: s1 [file s1]

Supplementary Table S1. Total medical cost to childhood cancer survivors from initial diagnosis by cancer types (mean  $\pm$  S.D.)

| Variables              | Total medical cost† |   |        |                                       |   |        |                      |   |        |                                   |   |        |                           |   |        |               |   |        |
|------------------------|---------------------|---|--------|---------------------------------------|---|--------|----------------------|---|--------|-----------------------------------|---|--------|---------------------------|---|--------|---------------|---|--------|
|                        | Leukemia            |   |        | Brain & Central Nervous System cancer |   |        | Non-Hodgkin lymphoma |   |        | Bone & Articular cartilage cancer |   |        | Mesothelioma Soft tissues |   |        | Other cancers |   |        |
|                        | Mean                | ± | S.D    | Mean                                  | ± | S.D    | Mean                 | ± | S.D    | Mean                              | ± | S.D    | Mean                      | ± | S.D    | Mean          | ± | S.D    |
|                        | 53,468              |   | 39,600 | 36,268                                | ± | 37,350 | 37,292               | ± | 35,574 | 52,049                            | ± | 39,766 | 35,686                    | ± | 36,204 | 21,204        | ± | 28,663 |
| Sex                    |                     |   |        |                                       |   |        |                      |   |        |                                   |   |        |                           |   |        |               |   |        |
| Male                   | 53,994              | ± | 40,000 | 37,930                                | ± | 38,345 | 38,142               | ± | 36,343 | 50,808                            | ± | 39,147 | 38,001                    | ± | 36,692 | 23,742        | ± | 31,778 |
| Female                 | 52,749              | ± | 39,060 | 33,976                                | ± | 35,848 | 35,298               | ± | 33,707 | 53,690                            | ± | 40,602 | 33,024                    | ± | 35,554 | 19,057        | ± | 25,549 |
| Age at diagnosis       |                     |   |        |                                       |   |        |                      |   |        |                                   |   |        |                           |   |        |               |   |        |
| 0-4                    | 46,615              | ± | 33,798 | 43,155                                | ± | 41,861 | 33,788               | ± | 38,441 | 29,765                            | ± | 31,442 | 39,570                    | ± | 35,920 | 27,846        | ± | 32,814 |
| 5-9                    | 48,584              | ± | 35,815 | 39,360                                | ± | 41,102 | 41,684               | ± | 36,976 | 46,985                            | ± | 41,658 | 42,216                    | ± | 42,548 | 24,551        | ± | 34,203 |
| 10-14                  | 63,295              | ± | 44,854 | 33,645                                | ± | 33,692 | 38,463               | ± | 31,095 | 56,044                            | ± | 40,503 | 28,228                    | ± | 31,668 | 17,557        | ± | 24,418 |
| 15-17                  | 66,014              | ± | 45,942 | 29,213                                | ± | 31,117 | 33,202               | ± | 37,557 | 53,939                            | ± | 37,451 | 29,844                    | ± | 35,473 | 13,357        | ± | 18,626 |
| Household income level |                     |   |        |                                       |   |        |                      |   |        |                                   |   |        |                           |   |        |               |   |        |
| Low                    | 46,166              | ± | 39,349 | 35,064                                | ± | 36,261 | 34,222               | ± | 33,461 | 50,988                            | ± | 40,925 | 35,285                    | ± | 39,889 | 19,043        | ± | 26,564 |
| Mid-low                | 50,966              | ± | 37,281 | 34,565                                | ± | 35,813 | 35,349               | ± | 37,272 | 45,427                            | ± | 42,759 | 36,064                    | ± | 35,985 | 21,460        | ± | 28,334 |
| Mid-high               | 57,734              | ± | 40,841 | 36,947                                | ± | 37,375 | 38,533               | ± | 36,331 | 52,717                            | ± | 34,746 | 35,028                    | ± | 33,217 | 23,341        | ± | 31,219 |
| High                   | 66,508              | ± | 38,690 | 40,548                                | ± | 41,739 | 43,085               | ± | 34,569 | 61,911                            | ± | 37,673 | 36,947                    | ± | 34,930 | 21,878        | ± | 29,105 |
| Treated hospital type  |                     |   |        |                                       |   |        |                      |   |        |                                   |   |        |                           |   |        |               |   |        |
| Tertiary hospital      | 53,512              | ± | 39,594 | 36,448                                | ± | 37,405 | 37,389               | ± | 35,581 | 52,896                            | ± | 39,598 | 35,961                    | ± | 36,222 | 21,434        | ± | 28,772 |
| Other                  | 8,846               | ± | 10,187 | 11,439                                | ± | 15,621 | 4,537                | ± | 5,279  | 4,796                             | ± | 7,555  | 1,862                     | ± | 1,882  | 4,253         | ± | 8,410  |
| Hospital region        |                     |   |        |                                       |   |        |                      |   |        |                                   |   |        |                           |   |        |               |   |        |
| Capital Area           | 54,860              | ± | 39,589 | 36,968                                | ± | 36,923 | 39,830               | ± | 35,248 | 56,352                            | ± | 35,017 | 40,681                    | ± | 37,541 | 24,059        | ± | 31,167 |
| Metropolitan           | 50,670              | ± | 39,093 | 37,411                                | ± | 41,911 | 27,662               | ± | 30,718 | 46,954                            | ± | 55,467 | 28,957                    | ± | 28,347 | 18,657        | ± | 27,043 |
| Rural Area             | 51,347              | ± | 39,699 | 32,657                                | ± | 35,708 | 34,951               | ± | 37,312 | 38,187                            | ± | 42,133 | 22,957                    | ± | 31,208 | 16,022        | ± | 21,931 |
| Chemotherapy           |                     |   |        |                                       |   |        |                      |   |        |                                   |   |        |                           |   |        |               |   |        |
| Yes                    | 56,961              | ± | 38,607 | 59,234                                | ± | 39,152 | 45,437               | ± | 35,147 | 67,820                            | ± | 33,792 | 52,400                    | ± | 35,686 | 35,849        | ± | 33,422 |
| No                     | 7,697               | ± | 18,239 | 15,394                                | ± | 18,852 | 4,891                | ± | 8,503  | 6,767                             | ± | 8,703  | 7,989                     | ± | 11,967 | 5,919         | ± | 7,487  |
| Radiotherapy           |                     |   |        |                                       |   |        |                      |   |        |                                   |   |        |                           |   |        |               |   |        |

|                        |        |   |        |        |   |        |        |   |        |        |   |        |        |   |        |        |   |        |
|------------------------|--------|---|--------|--------|---|--------|--------|---|--------|--------|---|--------|--------|---|--------|--------|---|--------|
| Yes                    | 78,466 | ± | 42,439 | 51,700 | ± | 38,682 | 59,406 | ± | 44,827 | 63,322 | ± | 39,866 | 64,529 | ± | 39,522 | 35,590 | ± | 38,923 |
| No                     | 47,844 | ± | 36,667 | 20,184 | ± | 28,004 | 33,243 | ± | 32,039 | 50,853 | ± | 39,610 | 23,102 | ± | 26,142 | 16,112 | ± | 21,853 |
| <b>Surgery</b>         |        |   |        |        |   |        |        |   |        |        |   |        |        |   |        |        |   |        |
| Yes                    | 98,946 | ± | 42,117 | 44,346 | ± | 40,294 | 49,090 | ± | 40,750 | 60,914 | ± | 37,839 | 40,095 | ± | 38,034 | 24,512 | ± | 31,865 |
| No                     | 45,213 | ± | 32,986 | 19,894 | ± | 23,093 | 26,372 | ± | 25,590 | 13,228 | ± | 19,677 | 18,797 | ± | 20,927 | 13,693 | ± | 17,347 |
| <b>Medical service</b> |        |   |        |        |   |        |        |   |        |        |   |        |        |   |        |        |   |        |
| Inpatient              | 43,623 |   | 35,607 | 24,509 | ± | 28,872 | 28,932 | ± | 30,924 | 43,473 | ± | 34,504 | 26,003 | ± | 29,334 | 15,292 | ± | 23,065 |
| Outpatient             | 9,844  |   | 10,863 | 11,759 | ± | 13,864 | 8,360  | ± | 7,809  | 8,575  | ± | 8,305  | 9,683  | ± | 9,794  | 5,912  | ± | 8,021  |

†Presented in KRW (KRW 1,200 = USD 1)      #Unit: 1,000 KRW

Supplementary Table S2. Result of regression analysis on total medical cost on childhood cancer survivors from the diagnosis by cancer types

|                               | Leukemia    |            |         | Brain & Central Nervous System cancer |            |         | Non-Hodgkin lymphoma |            |         |
|-------------------------------|-------------|------------|---------|---------------------------------------|------------|---------|----------------------|------------|---------|
|                               | $\beta$     | S.E        | P-value | $\beta$                               | S.E        | P-value | $\beta$              | S.E        | P-value |
| <b>Sex</b>                    |             |            |         |                                       |            |         |                      |            |         |
| Male                          | 836,872     | 1,407,483  | 0.552   | 94,711                                | 1,746,988  | 0.957   | 2,331,431            | 2,528,811  | 0.357   |
| Female                        | Ref.        |            |         | Ref.                                  |            |         | Ref.                 |            |         |
| <b>Age at diagnosis</b>       |             |            |         |                                       |            |         |                      |            |         |
| 0-4                           | -14,584,177 | 2,385,107  | <.001   | 12,450,270                            | 2,884,368  | <.001   | 1,934,374            | 3,834,783  | 0.614   |
| 5-9                           | -11,415,211 | 2,437,314  | <.001   | 7,298,551                             | 2,634,312  | 0.006   | 4,644,137            | 3,319,420  | 0.162   |
| 10-14                         | -752,637    | 2,477,536  | 0.761   | 1,800,376                             | 2,487,890  | 0.469   | -1,363,358           | 3,095,207  | 0.66    |
| 15-17                         | Ref.        |            |         | Ref.                                  |            |         | Ref.                 |            |         |
| <b>Household income level</b> |             |            |         |                                       |            |         |                      |            |         |
| Low                           | -10,651,896 | 2,216,395  | <.001   | -4,437,886                            | 2,686,130  | 0.099   | -4,211,034           | 3,446,032  | 0.222   |
| Mid-low                       | -8,219,093  | 2,213,367  | <.001   | -6,325,456                            | 2,679,531  | 0.018   | -3,241,599           | 3,437,882  | 0.346   |
| Mid-high                      | -4,920,631  | 2,280,399  | 0.031   | -1,400,541                            | 2,745,456  | 0.610   | -2,260,307           | 3,524,510  | 0.522   |
| High                          | Ref.        |            |         | Ref.                                  |            |         | Ref.                 |            |         |
| <b>Treated hospital type</b>  |             |            |         |                                       |            |         |                      |            |         |
| Tertiary hospital             | -11,178,789 | 22,249,488 | 0.615   | -7,037,596                            | 10,284,450 | 0.494   | 18,627,052           | 21,227,486 | 0.381   |
| Other                         | Ref.        |            |         | Ref.                                  |            |         | Ref.                 |            |         |
| <b>Hospital region</b>        |             |            |         |                                       |            |         |                      |            |         |
| Capital Area                  | -1,624,154  | 1,575,714  | 0.303   | -4,030,423                            | 2,332,431  | 0.084   | -2,674,067           | 2,711,456  | 0.324   |
| Metropolitan Area             | -2,222,317  | 2,684,135  | 0.408   | 2,944,945                             | 3,224,021  | 0.361   | -1,597,426           | 4,309,150  | 0.711   |
| Rural Area                    | Ref.        |            |         | Ref.                                  |            |         | Ref.                 |            |         |
| <b>Chemotherapy</b>           |             |            |         |                                       |            |         |                      |            |         |
| Yes                           | 41,433,148  | 2,776,405  | <.001   | 34,613,699                            | 1,987,569  | <.001   | 34,914,124           | 3,034,258  | <.001   |
| No                            | Ref.        |            |         | Ref.                                  |            |         | Ref.                 |            |         |
| <b>Radiotherapy</b>           |             |            |         |                                       |            |         |                      |            |         |
| Yes                           | 17,187,175  | 1,855,259  | <.001   | 14,316,242                            | 2,015,649  | <.001   | 20,071,633           | 3,281,623  | <.001   |
| No                            | Ref.        |            |         | Ref.                                  |            |         | Ref.                 |            |         |
| <b>Surgery</b>                |             |            |         |                                       |            |         |                      |            |         |
| Yes                           | 45,272,419  | 1,978,982  | <.001   | 14,871,016                            | 1,875,789  | <.001   | 16,866,343           | 2,347,348  | <.001   |
| No                            | Ref.        |            |         | Ref.                                  |            |         | Ref.                 |            |         |

|                               | Bone & Articular cartilage cancer |           |         | Mesothelioma Soft tissues |            |         | Other cancers |           |         |
|-------------------------------|-----------------------------------|-----------|---------|---------------------------|------------|---------|---------------|-----------|---------|
|                               | $\beta$                           | S.E       | P-value | $\beta$                   | S.E        | P-value | $\beta$       | S.E       | P-value |
| <b>Sex</b>                    |                                   |           |         |                           |            |         |               |           |         |
| Male                          | 40,667                            | 2,514,519 | 0.987   | 307,766                   | 2,772,949  | 0.912   | 3,299,845     | 893,813   | <.001   |
| Female                        | Ref.                              |           |         | Ref.                      |            |         | Ref.          |           |         |
| <b>Age at diagnosis</b>       |                                   |           |         |                           |            |         |               |           |         |
| 0-4                           | -<br>11,009,650                   | 5,133,298 | 0.033   | 4,465,543                 | 4,239,393  | 0.293   | 11,092,453    | 1,222,607 | <.001   |
| 5-9                           | -1,299,568                        | 3,970,167 | 0.744   | 4,924,953                 | 5,196,387  | 0.344   | 8,085,063     | 1,509,013 | <.001   |
| 10-14                         | 5,608,614                         | 2,971,163 | 0.06    | 2,047,242                 | 4,499,836  | 0.649   | 4,409,422     | 1,257,460 | 0.001   |
| 15-17                         | Ref.                              |           |         | Ref.                      |            |         | Ref.          |           |         |
| <b>Household income level</b> |                                   |           |         |                           |            |         |               |           |         |
| Low                           | -5,441,040                        | 3,682,138 | 0.14    | -1,080,770                | 4,645,557  | 0.816   | -2,555,293    | 1,340,521 | 0.057   |
| Mid-low                       | -2,689,298                        | 3,582,205 | 0.453   | -3,684,314                | 4,522,067  | 0.416   | -235,815      | 1,371,490 | 0.864   |
| Mid-high                      | -1,710,960                        | 3,714,359 | 0.056   | -1,415,410                | 4,664,025  | 0.762   | -467,680      | 1,400,694 | 0.739   |
| High                          | Ref.                              |           |         | Ref.                      |            |         | Ref.          |           |         |
| <b>Treated hospital type</b>  |                                   |           |         |                           |            |         |               |           |         |
| Tertiary hospital             | -<br>11,109,303                   | 9,916,637 | 0.263   | 310,689                   | 15,576,622 | 0.984   | -3,164,421    | 3,874,816 | 0.414   |
| Other                         | Ref.                              |           |         | Ref.                      |            |         | Ref.          |           |         |
| <b>Hospital region</b>        |                                   |           |         |                           |            |         |               |           |         |
| Capital Area                  | 332,584                           | 3,473,007 | 0.924   | 4,703,840                 | 3,479,670  | 0.177   | 3,061,726     | 1,042,981 | 0.003   |
| Metropolitan Area             | 11,997,102                        | 4,698,020 | 0.011   | -2,514,190                | 5,522,980  | 0.649   | 2,064,178     | 1,467,679 | 0.16    |
| Rural Area                    | Ref.                              |           |         | Ref.                      |            |         | Ref.          |           |         |
| <b>Chemotherapy</b>           |                                   |           |         |                           |            |         |               |           |         |
| Yes                           | 53,393,437                        | 3,210,134 | <.001   | 32,662,924                | 3,224,499  | <.001   | 26,556,557    | 917,441   | <.001   |
| No                            | Ref.                              |           |         | Ref.                      |            |         | Ref.          |           |         |
| <b>Radiotherapy</b>           |                                   |           |         |                           |            |         |               |           |         |
| Yes                           | 5,208,673                         | 4,253,775 | 0.221   | 27,363,034                | 3,304,990  | <.001   | 18,779,016    | 1,039,004 | <.001   |
| No                            | Ref.                              |           |         | Ref.                      |            |         | Ref.          |           |         |
| <b>Surgery</b>                |                                   |           |         |                           |            |         |               |           |         |
| Yes                           | 24,512,017                        | 3,668,370 | <.001   | 11,769,426                | 3,492,065  | 0.001   | 8,425,458     | 980,295   | <.001   |
| No                            | Ref.                              |           |         | Ref.                      |            |         | Ref.          |           |         |

Supplementary Table S3. Cumulative medical cost of each childhood cancer survivors by treatment phase and socioeconomic status

| Household Income | Treatment Phase | Total medical cost† |                    |                      |                                   |                           |               |
|------------------|-----------------|---------------------|--------------------|----------------------|-----------------------------------|---------------------------|---------------|
|                  |                 | Leukemia            | Brain & CNS cancer | Non-Hodgkin lymphoma | Bone & Articular cartilage cancer | Mesothelioma Soft tissues | Other cancers |
| <b>Low</b>       | 0-3month        | 15,712              | 11,773             | 13,851               | 14,786                            | 7,607                     | 6,658         |
|                  | ≤6month         | 30,012              | 20,006             | 25,549               | 30,409                            | 16,070                    | 11,160        |
|                  | ≤9month         | 36,745              | 25,842             | 30,583               | 41,892                            | 25,750                    | 14,745        |
|                  | ≤1year          | 40,858              | 32,511             | 34,890               | 49,004                            | 33,367                    | 17,640        |
|                  | ≤2year          | 48,777              | 40,366             | 41,607               | 56,654                            | 44,864                    | 21,990        |
|                  | ≤3year          | 53,943              | 44,788             | 44,924               | 63,577                            | 49,056                    | 24,302        |
|                  | ≤4year          | 56,733              | 51,130             | 47,473               | 67,173                            | 53,611                    | 25,700        |
|                  | ≤5year          | 58,774              | 55,296             | 48,978               | 72,217                            | 57,026                    | 27,008        |
| <b>Mid low</b>   | 0-3month        | 17,300              | 12,477             | 13,334               | 13,134                            | 9,720                     | 6,868         |
|                  | ≤6month         | 30,325              | 20,647             | 24,284               | 28,345                            | 17,558                    | 12,275        |
|                  | ≤9month         | 37,218              | 26,281             | 29,284               | 41,668                            | 25,581                    | 15,620        |
|                  | ≤1year          | 42,448              | 32,217             | 33,616               | 48,102                            | 32,319                    | 19,009        |
|                  | ≤2year          | 50,214              | 39,136             | 39,430               | 55,292                            | 42,490                    | 24,032        |
|                  | ≤3year          | 55,523              | 43,626             | 44,877               | 63,002                            | 45,550                    | 26,516        |
|                  | ≤4year          | 58,802              | 48,766             | 47,955               | 67,765                            | 49,668                    | 28,850        |
|                  | ≤5year          | 61,317              | 53,870             | 49,487               | 71,883                            | 51,889                    | 29,851        |
| <b>Mid high</b>  | 0-3month        | 19,617              | 12,168             | 14,556               | 16,727                            | 9,253                     | 7,474         |
|                  | ≤6month         | 33,200              | 20,551             | 23,510               | 30,675                            | 17,565                    | 12,785        |
|                  | ≤9month         | 41,011              | 26,495             | 27,397               | 40,605                            | 25,496                    | 17,083        |
|                  | ≤1year          | 46,112              | 31,900             | 31,439               | 46,525                            | 32,372                    | 20,978        |
|                  | ≤2year          | 53,891              | 39,633             | 38,040               | 53,651                            | 39,692                    | 26,379        |
|                  | ≤3year          | 58,579              | 45,228             | 42,532               | 58,421                            | 44,645                    | 28,831        |
|                  | ≤4year          | 62,073              | 49,722             | 44,348               | 62,124                            | 47,357                    | 30,554        |
|                  | ≤5year          | 64,042              | 54,809             | 47,462               | 65,395                            | 48,636                    | 32,266        |
| <b>High</b>      | 0-3month        | 22,987              | 13,789             | 16,739               | 19,218                            | 9,995                     | 7,332         |
|                  | ≤6month         | 37,247              | 21,665             | 25,874               | 34,296                            | 19,102                    | 12,266        |
|                  | ≤9month         | 44,787              | 28,402             | 31,591               | 45,792                            | 26,337                    | 16,345        |
|                  | ≤1year          | 49,932              | 35,914             | 34,521               | 50,319                            | 33,454                    | 20,609        |
|                  | ≤2year          | 58,833              | 45,930             | 39,859               | 58,094                            | 41,538                    | 25,381        |
|                  | ≤3year          | 63,917              | 51,950             | 43,034               | 64,079                            | 44,913                    | 27,766        |
|                  | ≤4year          | 66,259              | 55,796             | 45,745               | 65,485                            | 46,554                    | 29,165        |
|                  | ≤5year          | 67,927              | 59,358             | 47,088               | 68,287                            | 49,614                    | 30,405        |

†Presented in KRW (KRW 1,200 = USD 1)

‡Unit: 1,000 KRW
